# Supplementary material for: ABCC8R1420H Loss-of-Function Variant in a Southwest American Indian Community: Association With Increased Birth Weight and Doubled Risk of Type 2 Diabetes
Source: Oxford University Press journal article supplement (doi:10.2337/db15-0459), 2015-08-05
Supplement: db150459supplementarydata3.xlsx [file db150459supplementarydata3.xlsx]

## Sheet: Sheet1
Supplementary Table 3–Association with acute insulin response and additional metabolic traits in 298 normal glucose tolerant full-heritage Pima Indians
					AIR [μU/ml]						Percent body fat						Insulin sensitivity [mg/kg EMBS•min]						Fasting glucose [mg/dl]						2 hr glucose [mg/dl]						log10 Fasting insulin [μU/ml]						log10 2 hr insulin [μU/ml]
Gene	Missense	M/M (N)	M/m (N)	m/m (N)	M/M	M/m	m/m	Bminor allele	P*		M/M	M/m	m/m	Bminor allele	P†		M/M	M/m	m/m	Bminor allele	P‡		M/M	M/m	m/m	Bminor allele	P‡		M/M	M/m	m/m	Bminor allele	P‡		M/M	M/m	m/m	Bminor allele	P‡		M/M	M/m	m/m	Bminor allele	P‡
KCNJ11	V337I	TT (109)	T/C (135)	C/C (43)	2.32 ± 0.29	2.34 ± 0.29	2.29 ± 0.25	-0.018	0.46		32.4 ± 8.4	31.1 ± 8.7	29.8 ± 7.6	-0.24	0.69		0.58 ± 0.12	0.56 ± 0.12	0.56 ± 0.12	-0.01	0.2		89 ± 9.2	88 ± 8.9	88 ± 9.0	0.15	0.84		108 ± 20	109 ± 20	110 ± 19	1.95	0.25		1.52 ± 0.22	1.53 ± 0.24	1.52 ± 0.19	0.018	0.22		2.06 ± 0.30	2.11 ± 0.33	2.02 ± 0.28	0.023	0.35
KCNJ11	E23K	C/C (113)	C/T (137)	T/T (44)	2.33 ± 0.29	2.33 ± 0.29	2.29 ± 0.25	-0.022	0.37		32.4 ± 8.4	31.2 ± 8.5	29.6 ± 7.8	-0.27	0.65		0.58 ± 0.12	0.56 ± 0.12	0.57 ± 0.12	-0.01	0.23		89 ± 9.1	88 ± 9.0	88 ± 8.7	0.15	0.84		108 ± 20	108 ± 20	110 ± 19	2.2	0.2		1.52 ± 0.22	1.54 ± 0.23	1.51 ± 0.20	0.018	0.22		2.06 ± 0.30	2.11 ± 0.31	2.02 ± 0.29	0.023	0.35
ABCC8	K1565E	T/T (294)	T/C (1)	C/C (0)
ABCC8	R1420H	C/C (290)	C/T (8)	T/T (0)	2.33 ± 0.28	2.20 ± 0.40	―	-0.023	0.83		31.6 ± 8.5	26.9 ± 8.6	―	-9.01	0.0001		0.57 ± 0.12	0.71 ± 0.14	―	0.08	0.03		88 ± 8.9	86 ± 7.3	―	-1.71	0.58		108 ± 20	111 ± 15	―	2.59	0.72		1.53 ± 0.22	1.30 ± 0.07	―	-0.12	0.06		2.08 ± 0.31	1.90 ± 0.40	―	-0.11	0.29
ABCC8	A1369S	A/A (107)	A/C (127)	C/C (42)	2.33 ± 0.29	2.33 ± 0.29	2.29 ± 0.24	-0.022	0.39		32.4 ± 8.4	30.7 ± 8.7	29.1 ± 7.8	-0.38	0.53		0.58 ± 0.12	0.56 ± 0.12	0.57 ± 0.12	-0.01	0.17		89 ± 9.3	88 ± 8.8	88 ± 8.9	0.32	0.68		108 ± 20	109 ± 19	111 ± 20	3.13	0.07		1.51 ± 0.22	1.53 ± 0.24	1.51 ± 0.20	0.025	0.11		2.05 ± 0.30	2.11 ± 0.32	2.03 ± 0.27	0.041	0.1
ABCC8	G1316Q	C/C (296)	C/T (0)	T/T (0)
ABCC8	M801I	C/C (230)	C/A (24)	A/A (1)	2.31 ± 0.28	2.50 ± 0.34	2.16 ± 0.00	0.13	0.08		31.2 ± 8.4	36.0 ± 7.4	36.6 ± 0.00	1.16	0.38		0.57 ± 0.12	0.56 ± 0.09	0.55 ± 0.00	0.02	0.3		88 ± 8.9	88 ± 8.2	93 ± 0.00	-1.76	0.28		109 ± 19	104 ± 21	131 ± 0	-4.73	0.2		1.53 ± 0.22	1.60 ± 0.17	1.50 ± 0.00	-0.01	0.78		2.09 ± 0.31	2.13 ± 0.29	2.32 ± 0.00	-0.016	0.77
ABCC8	D691E	A/A (291)	A/T (1)	T/T (0)
ABCC8	S165L	G/G (288)	G/A (9)	A/A (0)	2.32 ± 0.28	2.47 ± 0.19	―	0.099	0.31		31.3 ± 8.6	32.2 ± 5.4	―	2.65	0.25		0.57 ± 0.12	0.51 ± 0.08	―	-0.04	0.26		88 ± 8.9	91 ± 4.9	―	3.33	0.26		108 ± 20	109 ± 19	―	0.47	0.95		1.52 ± 0.22	1.67 ± 0.13	―	0.061	0.02		2.07 ± 0.31	2.11 ± 0.27	―	0.056	0.57
Unadjusted means ± SD are given for each genotype group. Bminor allele is the regression coefficient or the difference in the mean value of the trait per copy of the minor allele. B and P-values are adjusted as follows:*Adjusted for age, sex, family membership, percent body fat, and glucose uptake rate during low dose insulin stimulation. †Adjusted for age, sex, and family membership. ‡Adjusted f…
